# Supplementary material
Source: Springer Nature journal article supplement (https://www.springermedizin.de/resource/supplementary/12889_2012_5268_MOESM4_ESM.pdf/9495002)

iron in groundwater

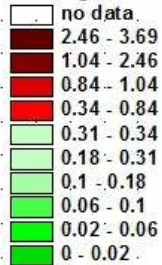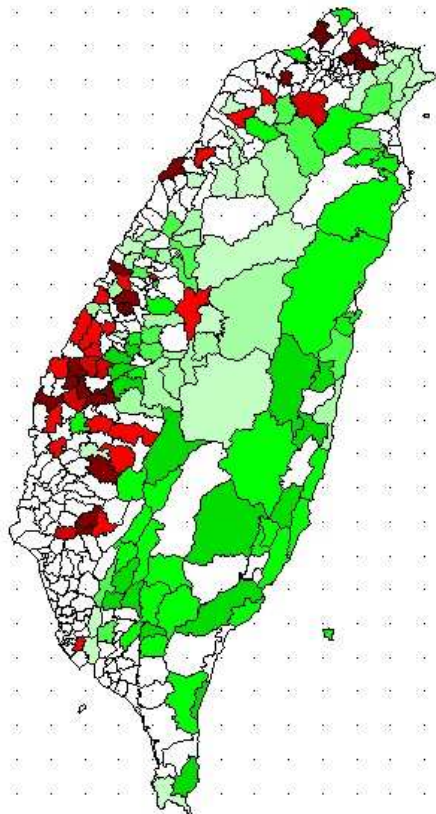

Supplement: MOESM4 [file 9495002]
